# Supplementary material for: Multifunctional cellulose phosphate-based food packaging films from biomass: structure–function relationship and environmental assessment studies
Source: Royal Society of Chemistry journal article supplement (doi:10.1039/d5fb00355e), 2025-10-03
Supplement: d5fb00355e1.pdf [file d5fb00355e1.pdf]

# Multifunctional cellulose phosphate-based food packaging films from biomass: Structure-functional relationship and environmental assessment studies

Rahul Ranjan<sup>a</sup>, Chandra Kant<sup>b</sup> and Prodyut Dhar<sup>a†</sup>

<sup>a</sup>School of Biochemical Engineering, Indian Institute of Technology (BHU), Varanasi, Uttar Pradesh-221005, India

<sup>b</sup>Department of Chemical Engineering, Indian Institute of Technology (BHU), Varanasi, Uttar Pradesh-221005, India

Corresponding author e-mail: [prodyut.bce@iitbhu.ac.in](mailto:prodyut.bce@iitbhu.ac.in)

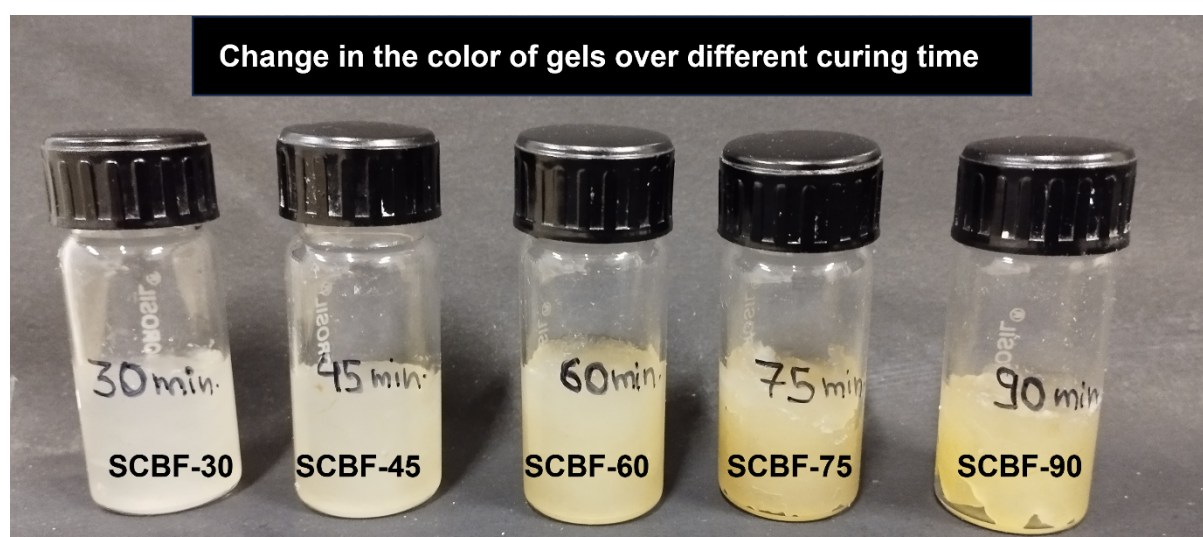

**Figure S1:** Colour of the gels produced at different curing time with DAHP and urea at 150°C

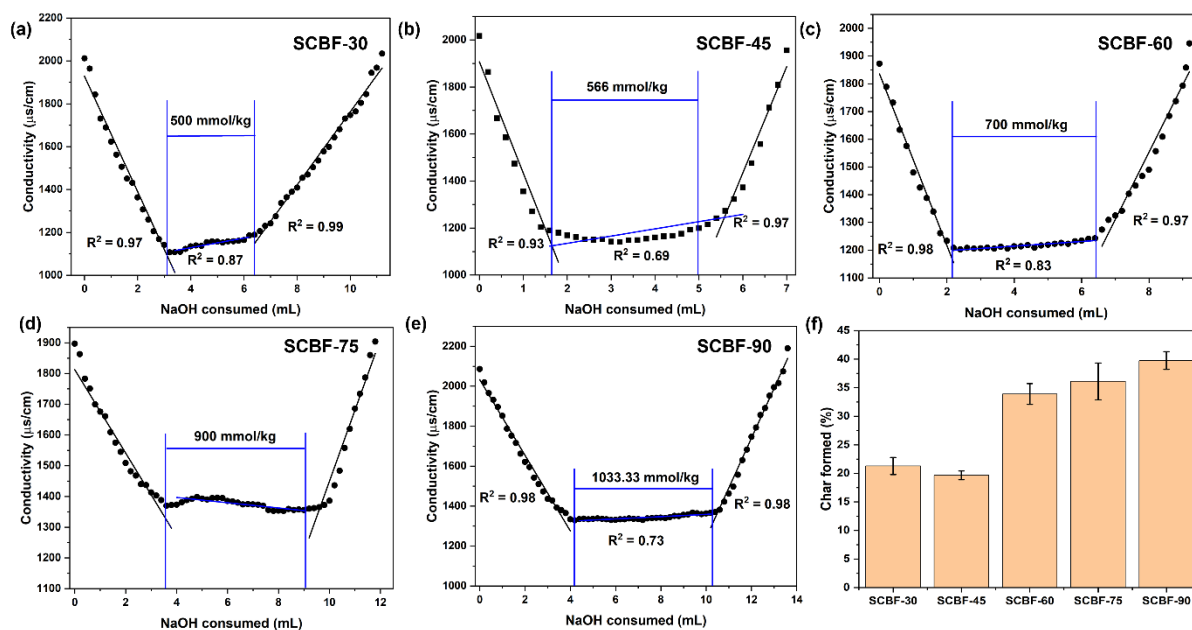

**Figure S2:** Present the charge content of the film produced after different curing times (30-90 minutes) (a) SCBF-30, (b) SCBF-45, (c) SCBF-60, (d) SCBF-75, (e) SCBF-90 and (f) the char residue formed after the flame test of the films.

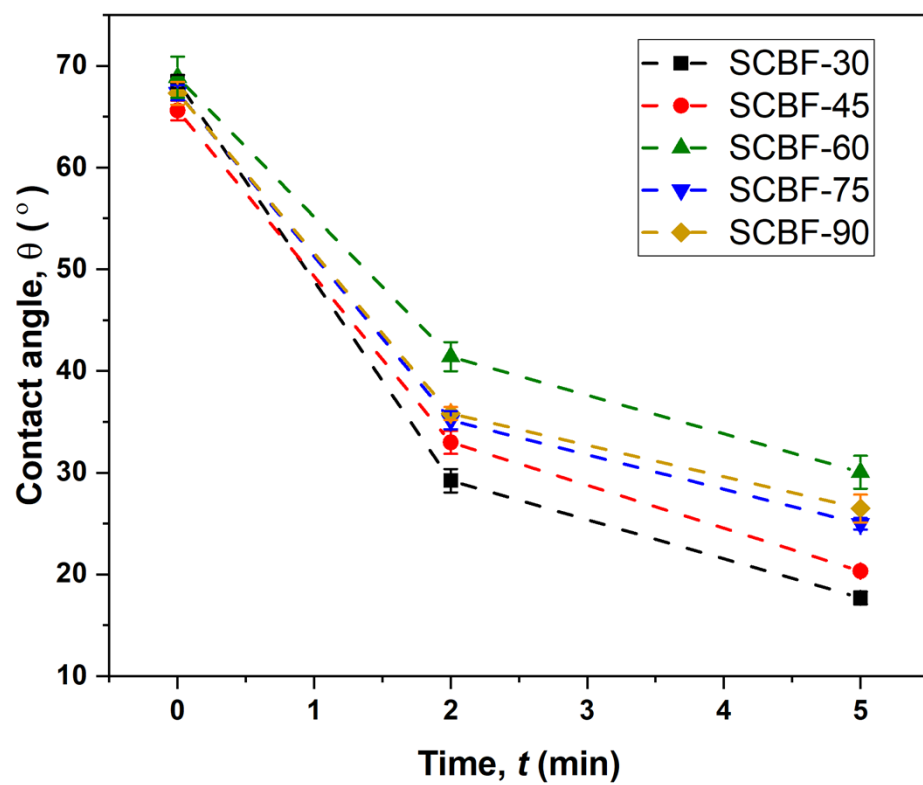

**Figure S3:** Represent the contact angle of the films between 0-5 minutes.

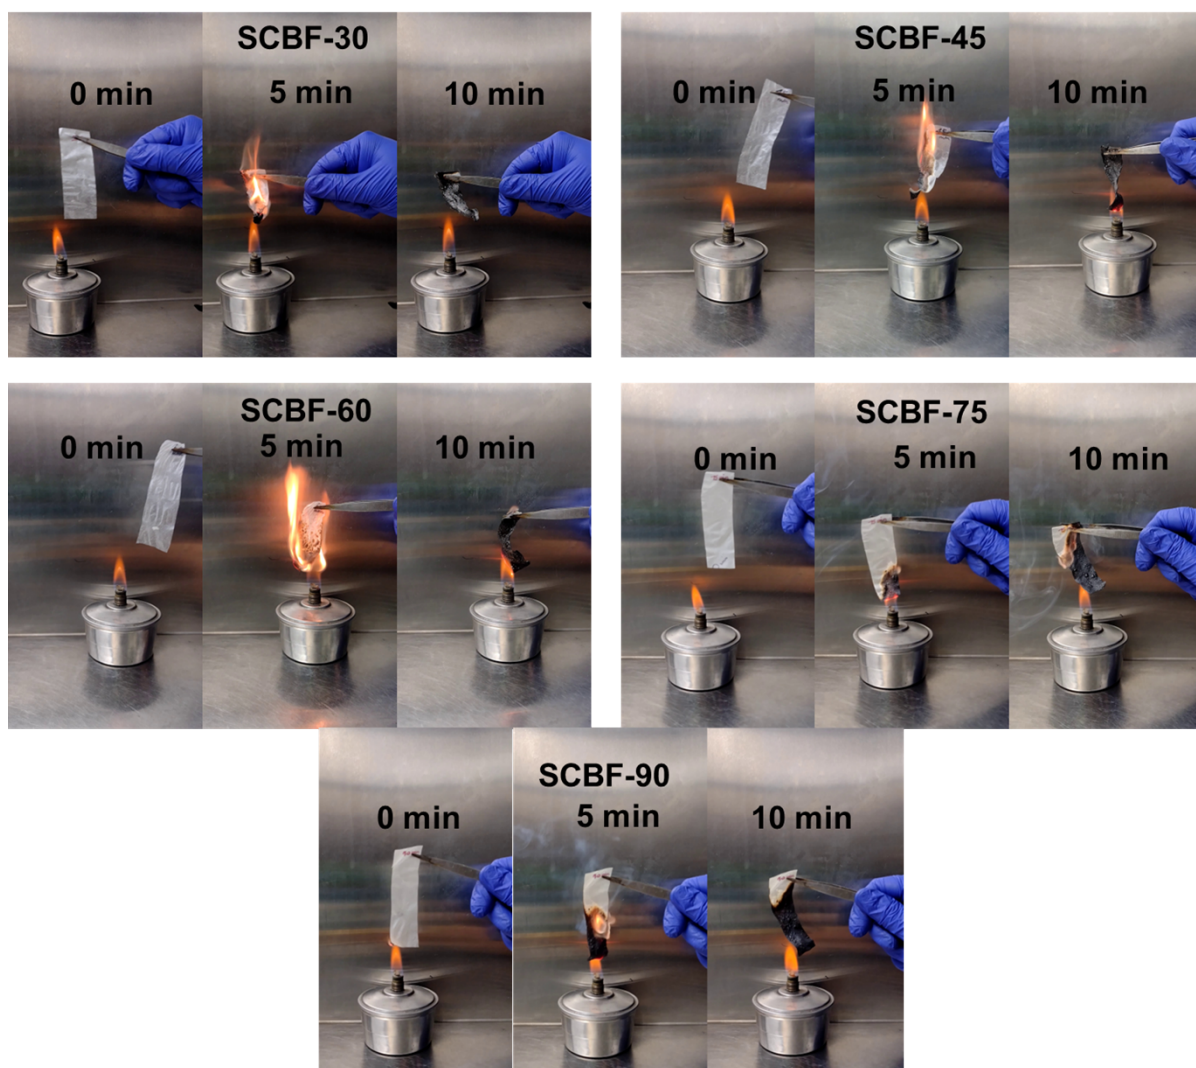

**Figure S4:** Flammability test of the films

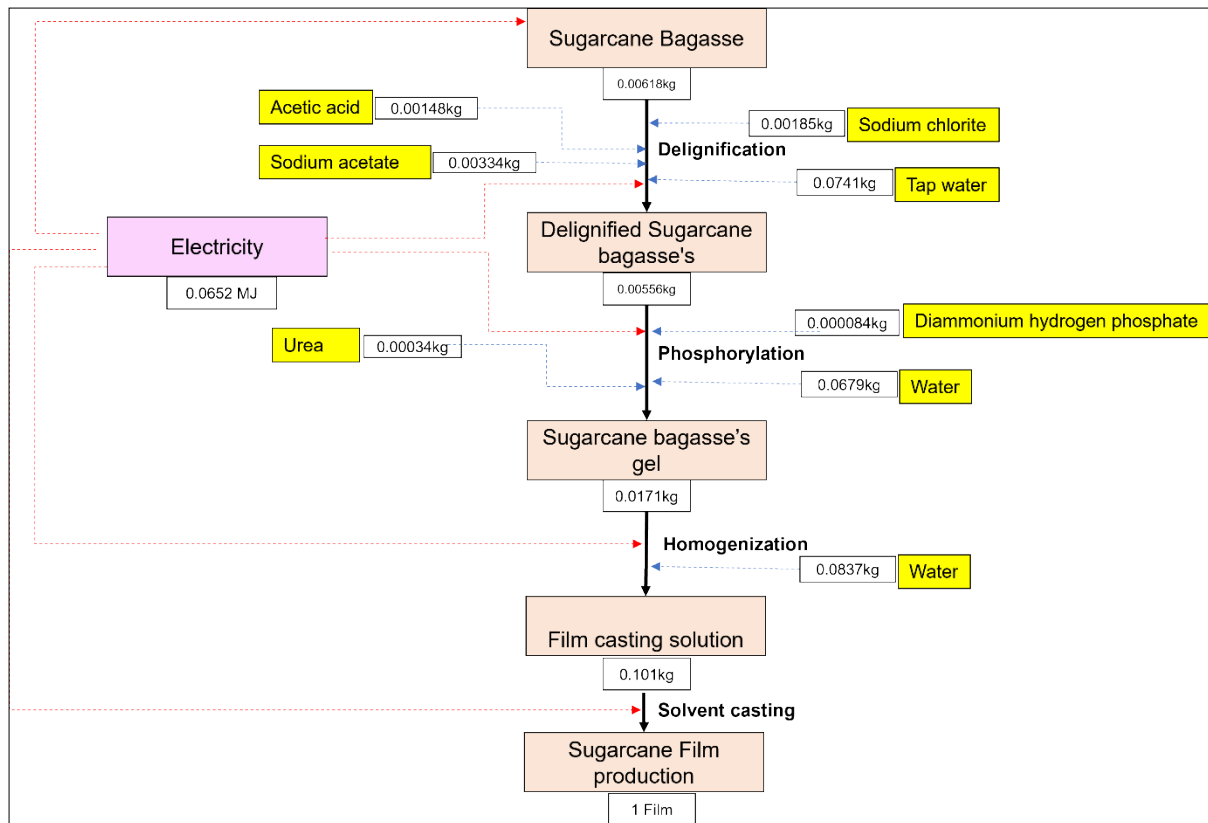

**Figure S5:** Present the flow chart for the production of 1 film weighing 4.7 g from the sugarcane bagasse waste via delignification, phosphorylation, homogenisation, casting and drying processes.

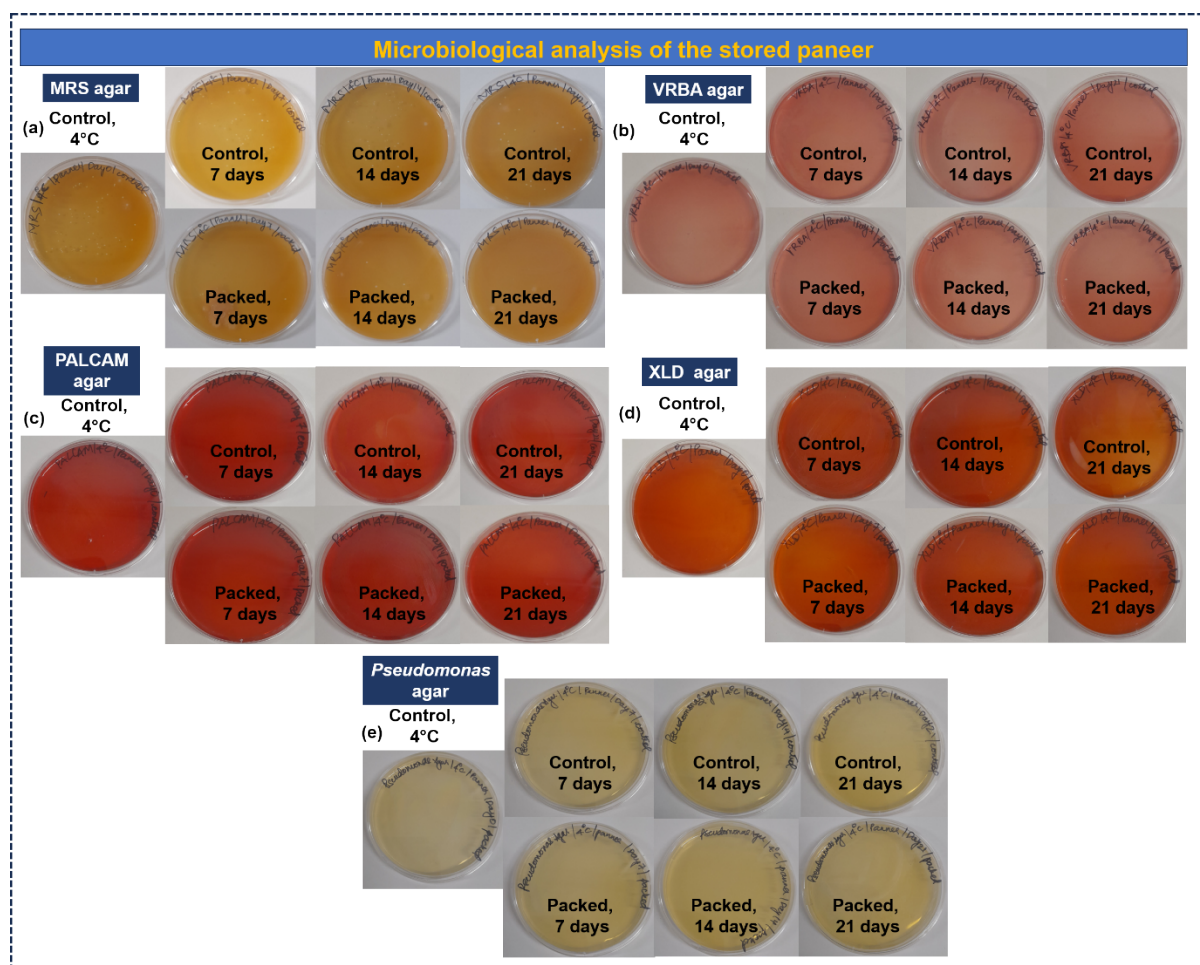

**Figure S6:** Microbiological analysis of the packaged and control samples in MRS, VRBA, PALCAM, XLD and Pseudomonas agar.

**Table S1:** List of assumptions considered during the LCA study

| List of assumptions                                                                                                                        |
|--------------------------------------------------------------------------------------------------------------------------------------------|
| Electricity sources considered in this study were considered from hard coal (GaBi)                                                         |
| 10% weight loss was taken during the phosphorylation and delignification process.                                                          |
| A circular film of diameter 16 cm is produced.                                                                                             |
| Solvent evaporation is not considered in the calculation of LCA.                                                                           |
| Liquid waste generated during the phosphorylation, washing, and delignification is not considered in the environmental impact calculation. |
| Sodium chlorite is replaced with sodium hypochlorite.                                                                                      |
| The study does not consider sugarcane bagasse production as it is regarded as waste.                                                       |



**Table S2:** sensitivity analysis of the dominant categories from the normalised mid-point results

| Categories                    | Electricity  |             | Delignification |             | Phosphorylation |             |
|-------------------------------|--------------|-------------|-----------------|-------------|-----------------|-------------|
|                               | 10% increase | 8% decrease | 10% increase    | 8% decrease | 10% increase    | 8% decrease |
| <b>Fossil depletion</b>       | 9.63         | -7.84       | 5.09            | -4.13       | 1.79            | -1.65       |
| Photochemical ozone formation | 10.00        | -7.69       | 5.38            | -3.85       | 2.31            | -1.54       |
| Terrestrial acidification     | 9.81         | -7.48       | 5.61            | -4.21       | 1.87            | -1.40       |

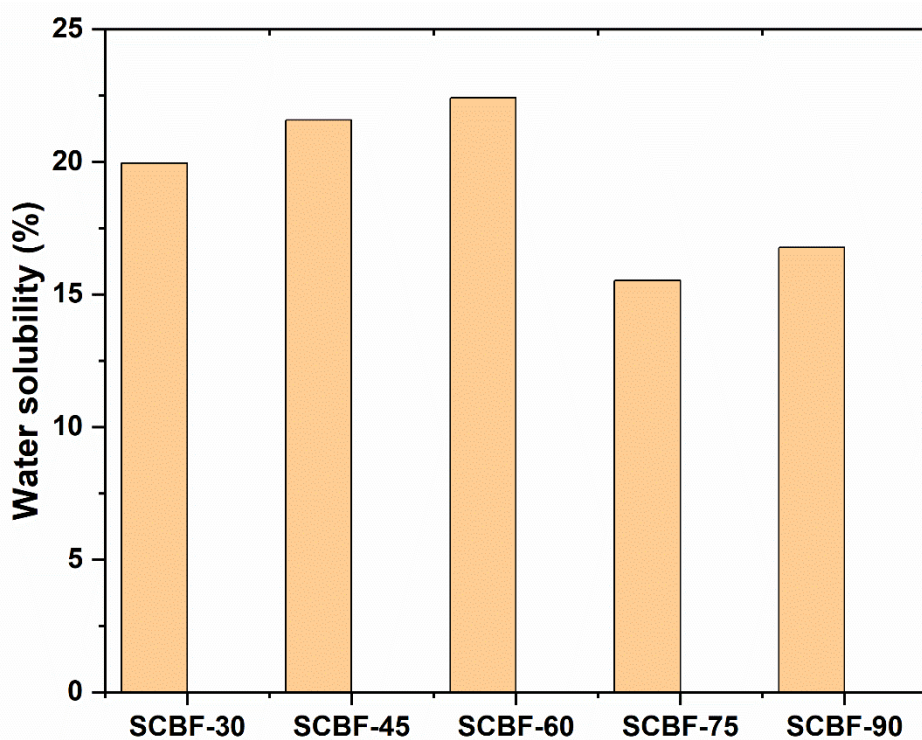

**Figure S7:** Water solubility of the developed phosphorylated SCB films at 30°C at pH-7 after 24 hours.

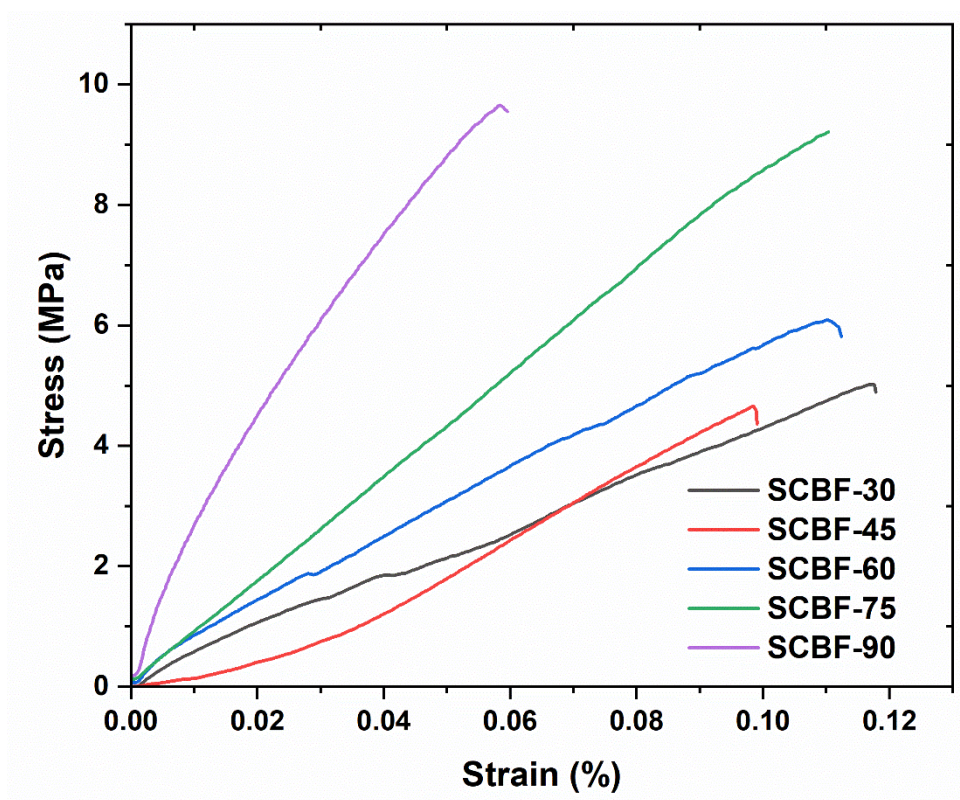

**Figure S8:** Mechanical properties of phosphorylated SCB films under wet conditions (Temperature 25°C, immersed in water for 30 minutes).

**Table S3:** WVTR and WVP of the films

| Film    | WVTR (g m <sup>-2</sup> .24h) | WVP (10 <sup>-12</sup> gm/m <sup>2</sup> .s.Pa) |
|---------|-------------------------------|-------------------------------------------------|
| SCBF-30 | 58.63                         | 9.42                                            |
| SCBF-45 | 43.65                         | 7.02                                            |
| SCBF-60 | 41.07                         | 6.60                                            |
| SCBF-75 | 40.08                         | 6.44                                            |
| SCBF-90 | 34.22                         | 5.50                                            |
